# Supplementary material
Source: publisher figshare collection journal article supplement (https://asha.figshare.com/articles/dataset/_/19858930)
Supplement: Supplementary file 1 [file 1]

**Supplemental Material S1.** Weighted logistic regression model for the association between hearing loss and the odds of different labor outcomes, including self-reported hearing perception as a covariate. Odds ratio (OR) and 95% confidence intervals (CI).

|                                                                                                                |  | Model 1             |                 | Model 2             |                 | Model 3             |                 |
|----------------------------------------------------------------------------------------------------------------|--|---------------------|-----------------|---------------------|-----------------|---------------------|-----------------|
|                                                                                                                |  | OR [95% CI]         | <i>p</i> -value | OR [95% CI]         | <i>p</i> -value | OR [95% CI]         | <i>p</i> -value |
| Odds ratio for being out of the labor force<br>(Subpopulation observations = 6,061)                            |  |                     |                 |                     |                 |                     |                 |
| <b>Hearing loss</b>                                                                                            |  |                     |                 |                     |                 |                     |                 |
| No hearing loss                                                                                                |  | ref                 |                 | ref                 |                 | ref                 |                 |
| Mild                                                                                                           |  | 1.59<br>[1.15,2.20] | .006            | 1.21<br>[0.86,1.70] | .274            | 1.06<br>[0.77,1.47] | .699            |
| Moderate or greater                                                                                            |  | 3.4 [1.86,6.24]     | 0               | 2.33<br>[1.13,4.77] | .023            | 2.12<br>[1.03,4.36] | .043            |
| <b>Perceived Hearing Trouble</b>                                                                               |  |                     |                 |                     |                 |                     |                 |
| No trouble                                                                                                     |  | ref                 |                 | ref                 |                 | ref                 |                 |
| Little/A lot of trouble                                                                                        |  | 1.4 [1.11,1.77]     | .006            | 1.37<br>[1.07,1.77] | .016            | 1.15<br>[0.86,1.53] | .332            |
| Odds ratio for being employed conditional on being in the labor force.<br>(Subpopulation observations = 4,609) |  |                     |                 |                     |                 |                     |                 |
| <b>Hearing loss</b>                                                                                            |  |                     |                 |                     |                 |                     |                 |
| No hearing loss                                                                                                |  | ref                 |                 | ref                 |                 | ref                 |                 |
| Mild                                                                                                           |  | 1.21<br>[0.67,2.20] | .509            | 1.08<br>[0.60,1.95] | .784            | 1.11<br>[0.66,1.88] | .684            |
| Moderate or greater                                                                                            |  | 1.02<br>[0.34,3.08] | .967            | 0.94<br>[0.31,2.86] | .912            | 0.96<br>[0.31,2.98] | .937            |
| <b>Perceived Hearing Trouble</b>                                                                               |  |                     |                 |                     |                 |                     |                 |
| No trouble                                                                                                     |  | ref                 |                 | ref                 |                 | ref                 |                 |
| Little/A lot of trouble                                                                                        |  | 0.9 [0.60,1.36]     | .616            | 0.84<br>[0.54,1.29] | .41             | 0.88<br>[0.55,1.41] | .587            |
| Odds ratio for full-time employment conditional on being employed<br>(Subpopulation observations = 3,969)      |  |                     |                 |                     |                 |                     |                 |
| <b>Hearing loss</b>                                                                                            |  |                     |                 |                     |                 |                     |                 |
| No hearing loss                                                                                                |  | ref                 |                 | ref                 |                 | ref                 |                 |
| Mild                                                                                                           |  | 0.83<br>[0.54,1.29] | .396            | 0.92<br>[0.59,1.42] | .694            | 0.9 [0.59,1.37]     | .603            |
| Moderate or greater                                                                                            |  | 1.72<br>[0.57,5.18] | .326            | 2.16<br>[0.70,6.66] | .174            | 2.17<br>[0.72,6.59] | .164            |
| <b>Perceived Hearing Trouble</b>                                                                               |  |                     |                 |                     |                 |                     |                 |
| No trouble                                                                                                     |  | ref                 |                 | ref                 |                 | ref                 |                 |
| Little/A lot of trouble                                                                                        |  | 0.93<br>[0.68,1.28] | .647            | 0.89<br>[0.66,1.20] | .439            | 0.89<br>[0.67,1.18] | .394            |

*Note.* Goodness of fit tested using the Hosmer-Lemeshow goodness of fit test for logistic regression. Model 1 adjusted only for type of hearing loss. Model 2 additionally adjusted for age, age2, sex, and race/ethnicity.
