# Supplementary material
Source: publisher figshare collection journal article supplement (https://asha.figshare.com/articles/dataset/_/19858930)
Supplement: Supplementary file 2 [file 1]

**Supplemental Material S2.** Weighted logistic regression model for the association between better-ear PTA and the odds of different labor outcomes, including self-reported hearing perception as a covariate. Odds ratio (OR) and 95% confidence intervals (CI).

|                                                                                                                | Model 1             |                 | Model 2             |                 | Model 3             |                 |
|----------------------------------------------------------------------------------------------------------------|---------------------|-----------------|---------------------|-----------------|---------------------|-----------------|
|                                                                                                                | OR [95% CI]         | <i>p</i> -value | OR [95% CI]         | <i>p</i> -value | OR [95% CI]         | <i>p</i> -value |
| Odds ratio for being out of the labor force<br>(Subpopulation observations = 9,963)                            |                     |                 |                     |                 |                     |                 |
| <b>PTA</b>                                                                                                     | 1.39<br>[1.30,1.49] | < .001          | 1.28<br>[1.18,1.39] | < .001          | 1.10<br>[1.02,1.19] | .011            |
| Odds ratio for being employed conditional on being in the labor force.<br>(Subpopulation observations = 7,486) |                     |                 |                     |                 |                     |                 |
| <b>PTA</b>                                                                                                     | 1.01<br>[0.89,1.14] | .892            | 0.93<br>[0.82,1.07] | .357            | 0.97<br>[0.84,1.12] | .673            |
| Odds ratio for full-time employment conditional on being employed<br>(Subpopulation observations = 6,518)      |                     |                 |                     |                 |                     |                 |
| <b>PTA</b>                                                                                                     | 1.05<br>[0.95,1.16] | .303            | 1.09<br>[0.96,1.23] | .187            | 1.10<br>[0.97,1.24] | .138            |

*Note.* Goodness of fit tested using the Hosmer-Lemeshow goodness of fit test for logistic regression. Model 1 adjusted only for type of hearing loss. Model 2 additionally adjusted for age, age2, sex, and race/ethnicity. Model 3 additionally adjusted for education, marital status, health status, number of people in the household, and study round fixed effects.
